# Supplementary material for: The Influence of Lipid Electric Charge on the Binding of Aβ(1–42) Amyloid Peptide to Bilayers in the Liquid-Ordered State
Source: MDPI journal article supplement (doi:10.3390/biom14030298), 2024-03-01
Supplement: s1 [file s1]

## **SUPPLEMENTARY FIGURE**

**The influence of lipid electric charge on the binding of  $\beta$ -amyloid (1–42) peptide to bilayers in the liquid-ordered state**

**Ahyayauch et al.**

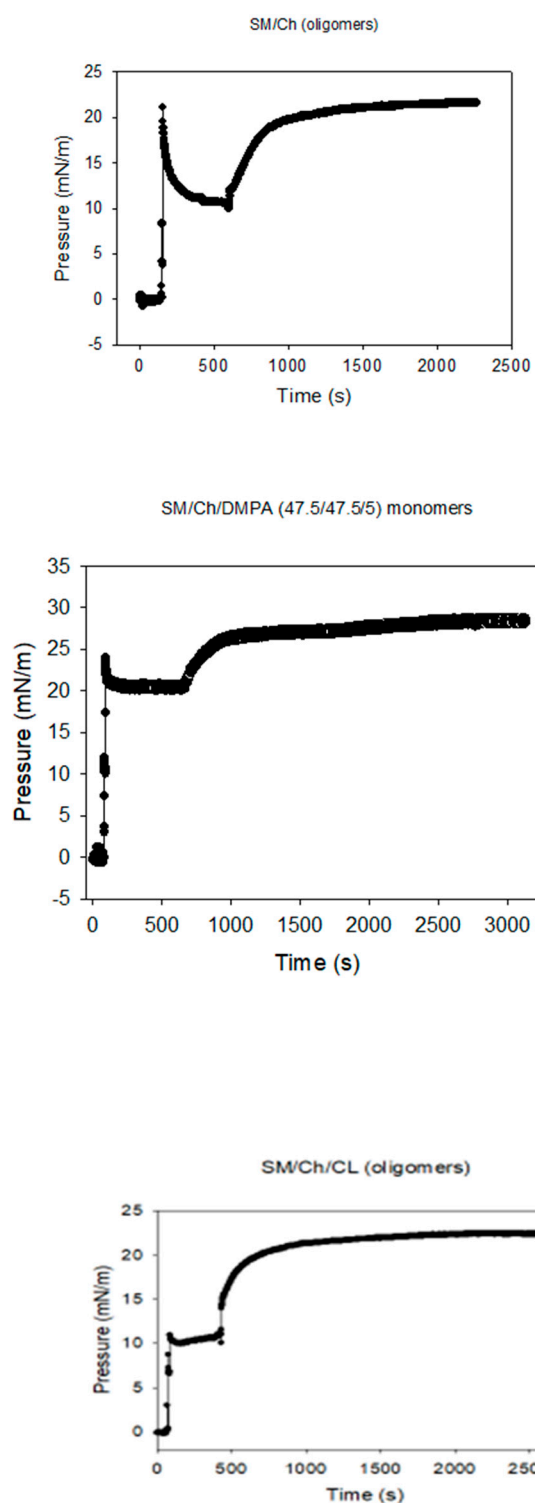

**Figure S1. Langmuir balance studies of Aβ42 interaction with membrane lipids.** Representative time courses of the change in surface pressure of a lipid monolayer, at the air-water interface, upon addition of Aβ42 monomers into the subphase. Aβ42 stock

solution was 50  $\mu\text{M}$ . A $\beta$ 42 final concentration in the trough was 1.22  $\mu\text{M}$ . T = 22  $^{\circ}\text{C}$ . Monolayer compositions and state of aggregation of A $\beta$  are given on top of each plot.
